# Supplementary figures and images for: Risk factors for future osteoporosis in perimenopausal Japanese women
Source: PubMed Central journal article supplement — Menopause. 2022 Aug 20;29(10):1176–83. doi: 10.1097/GME.0000000000002034 (PMC9512233; doi:10.1097/gme.0000000000002034), 2022-08-20

A

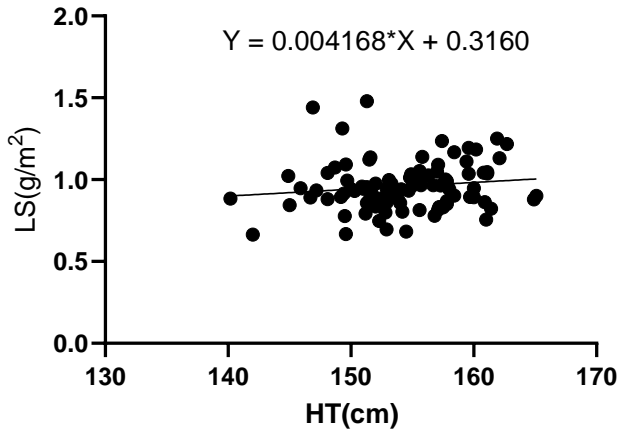

B

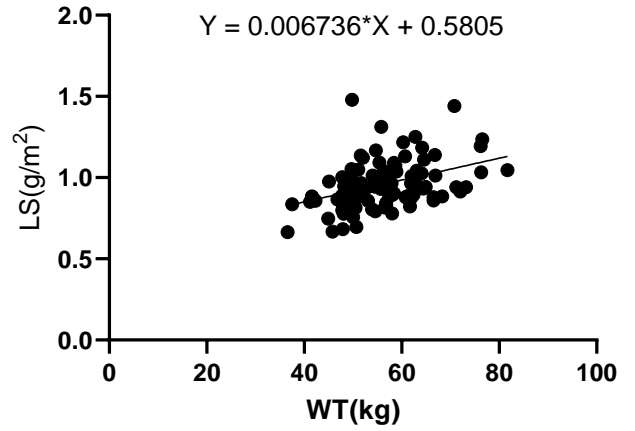

C

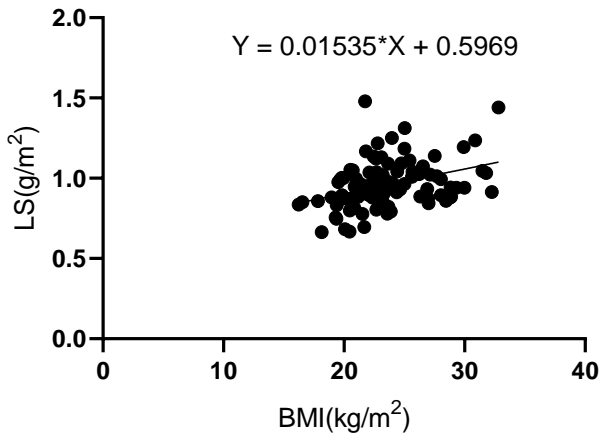

D

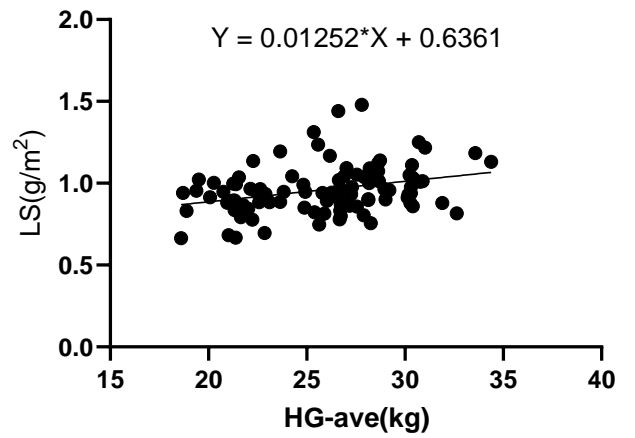

E

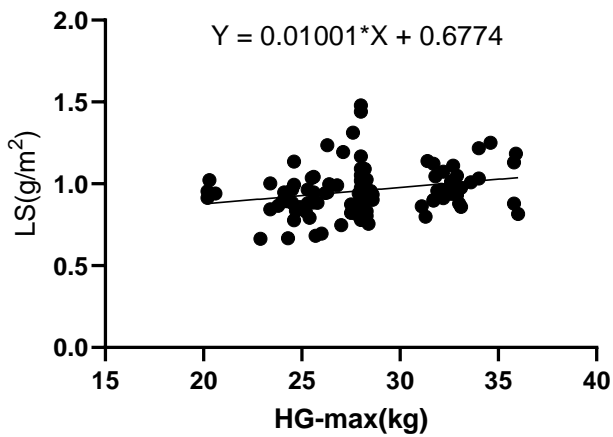

Supplement: meno-29-1176-s001.pdf [file meno-29-1176-s001.pdf]

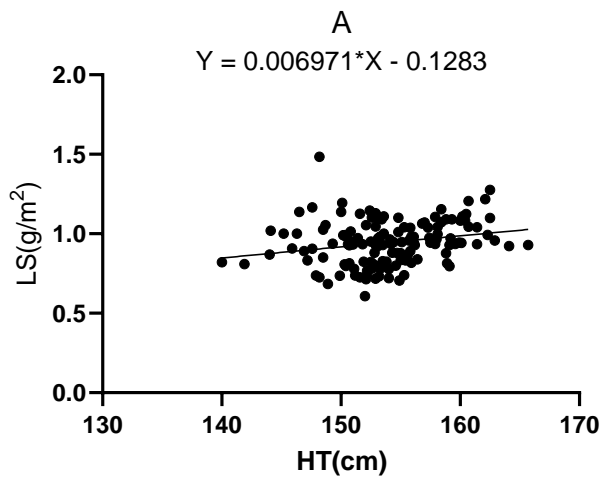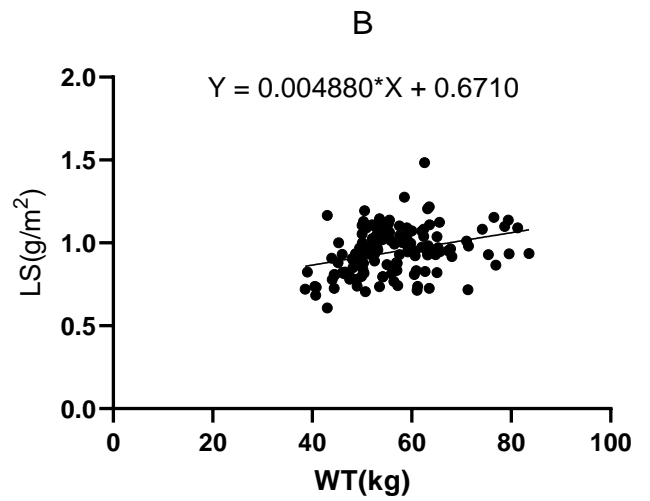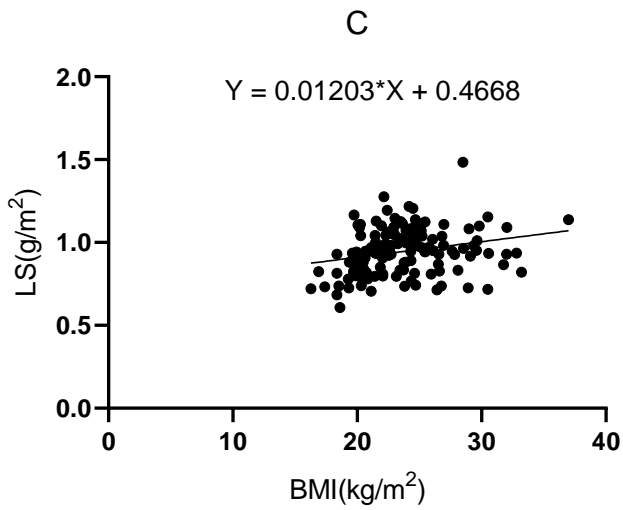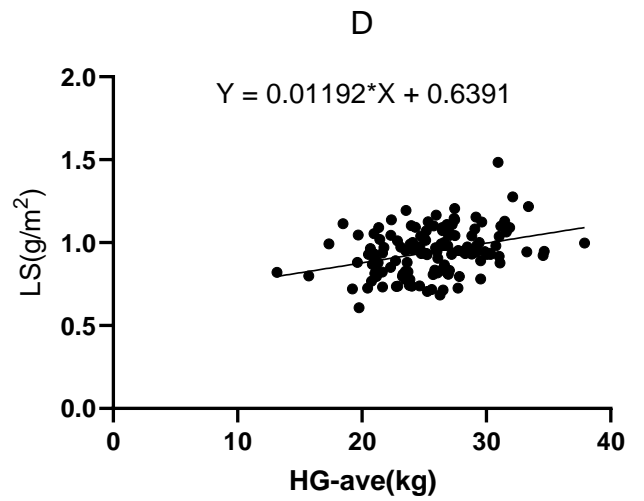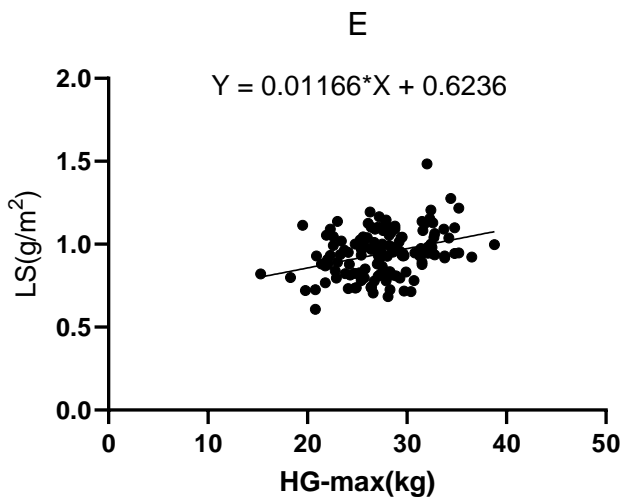

Supplement: meno-29-1176-s002.pdf [file meno-29-1176-s002.pdf]

A

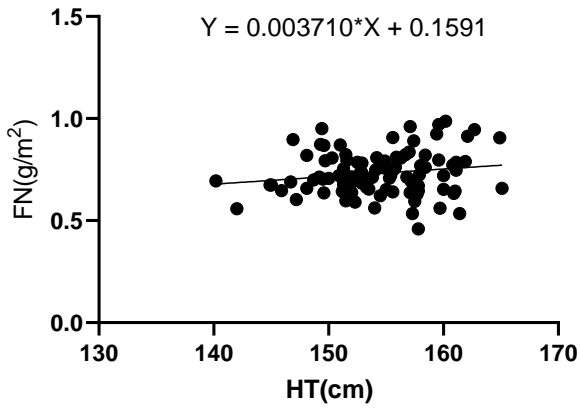

B

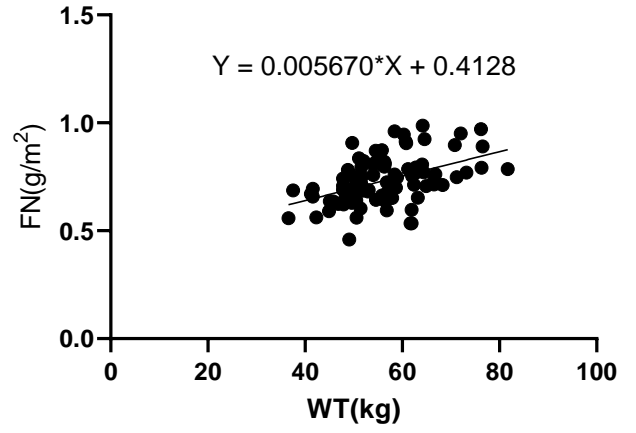

C

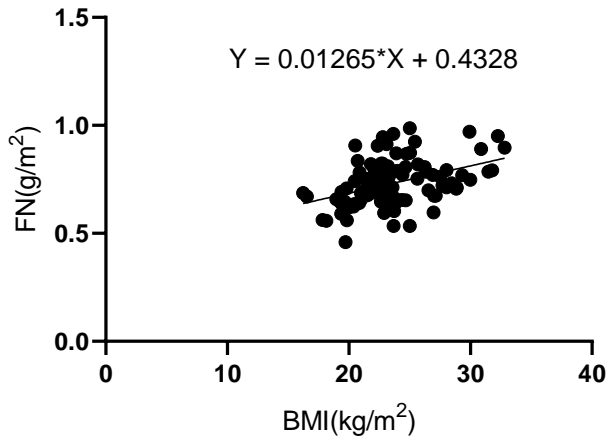

D

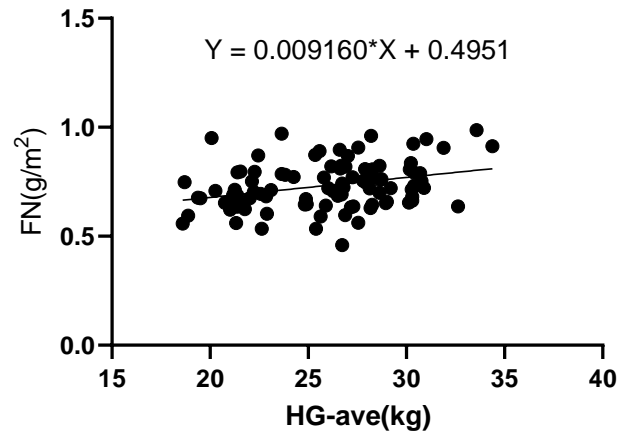

E

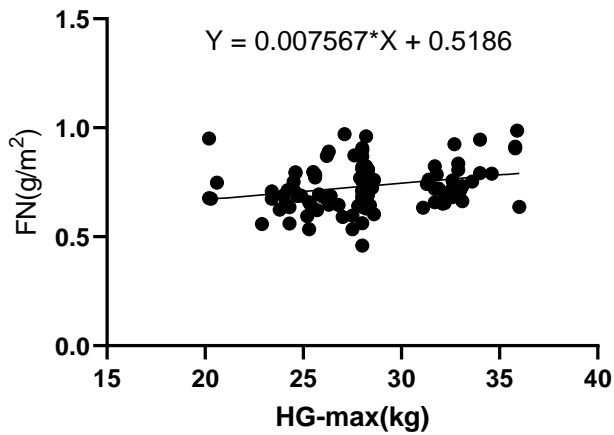

Supplement: meno-29-1176-s003.pdf [file meno-29-1176-s003.pdf]

A

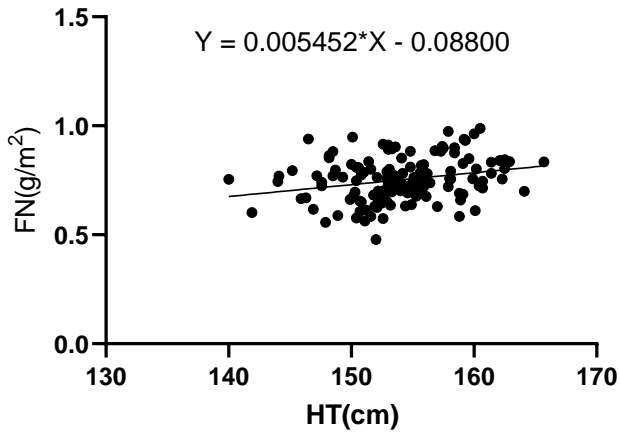

B

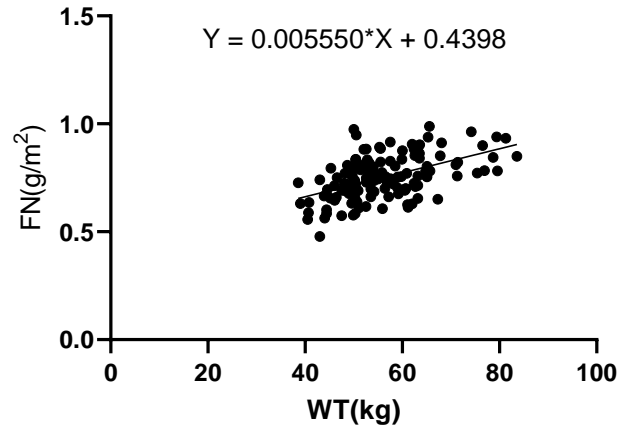

C

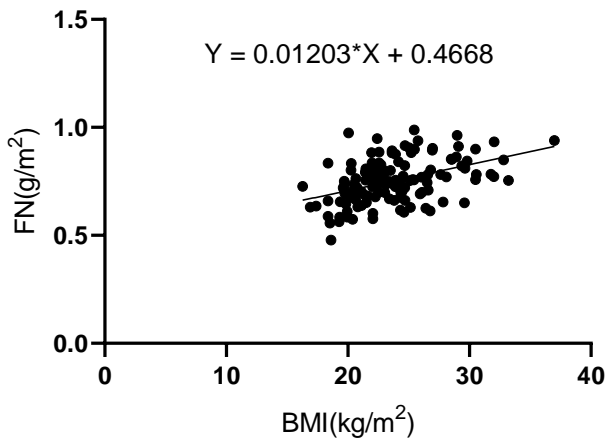

D

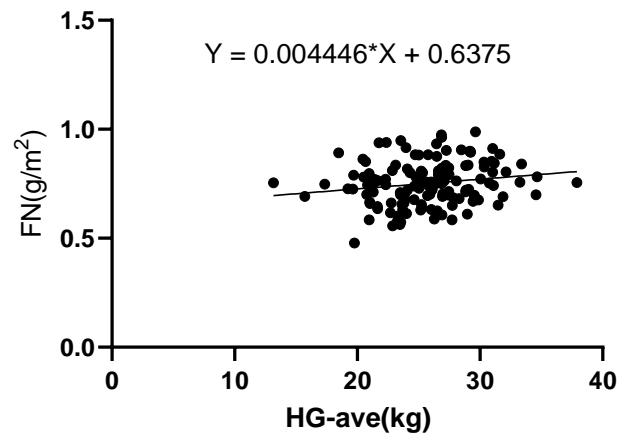

E

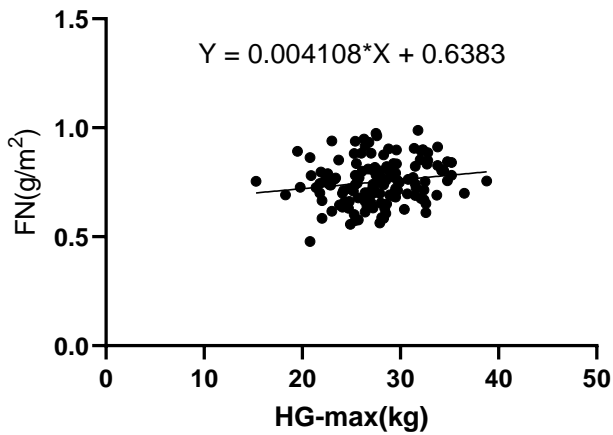

Supplement: meno-29-1176-s004.pdf [file meno-29-1176-s004.pdf]

A

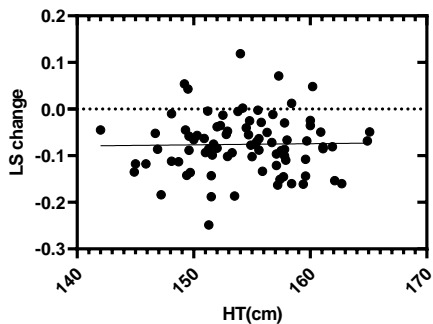

B

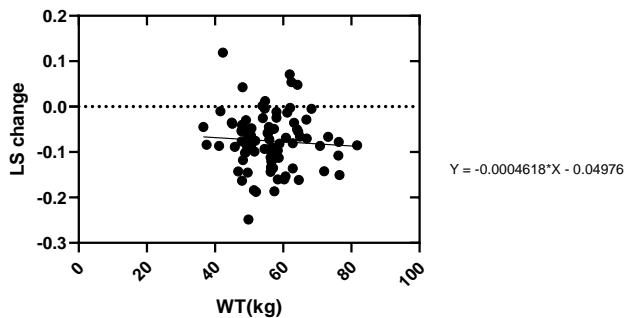

C

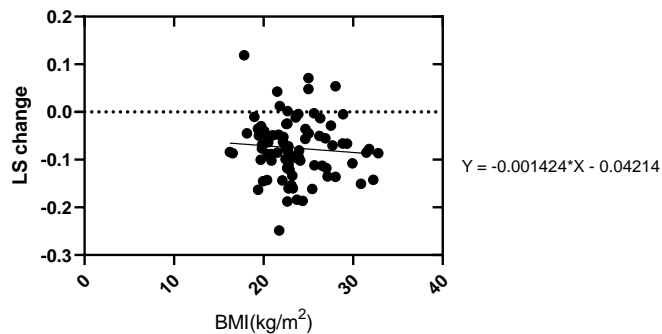

D

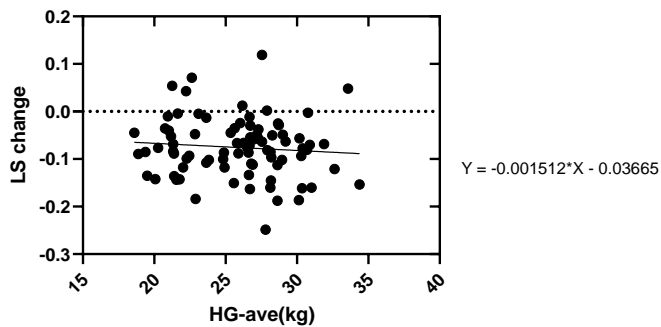

E

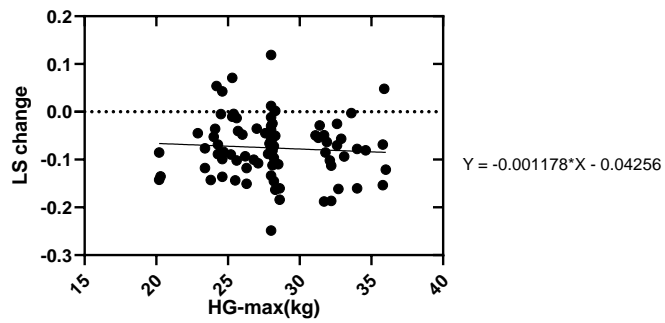

Supplement: meno-29-1176-s005.pdf [file meno-29-1176-s005.pdf]

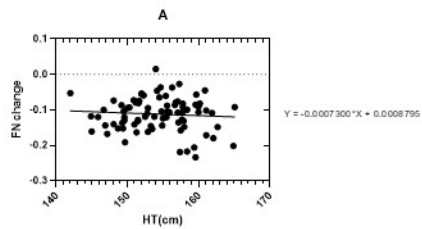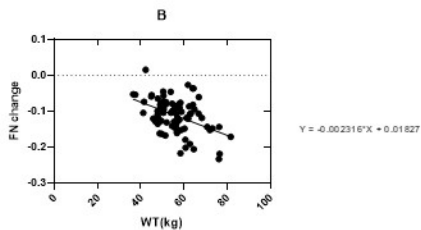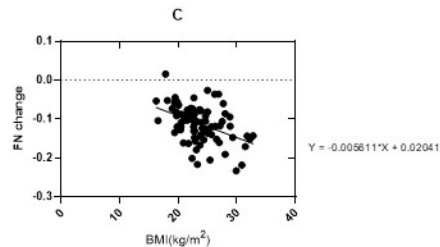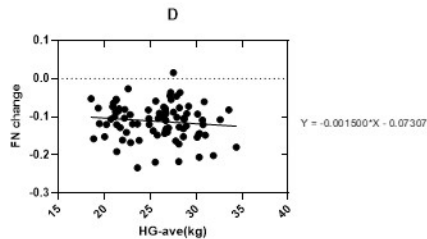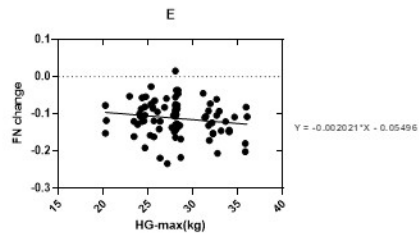

Supplement: meno-29-1176-s007.pdf [file meno-29-1176-s007.pdf]

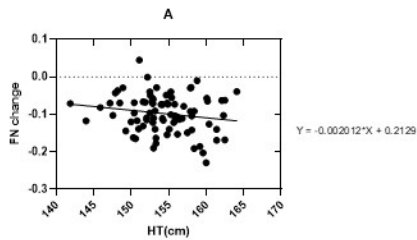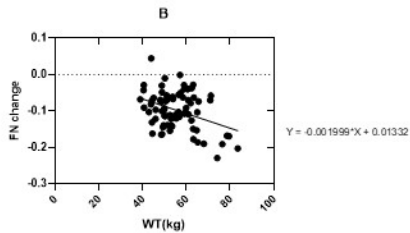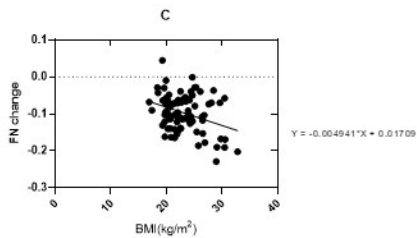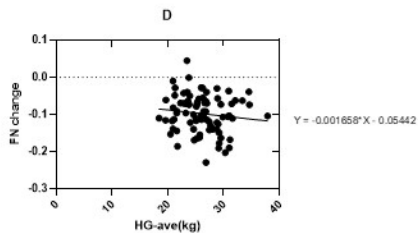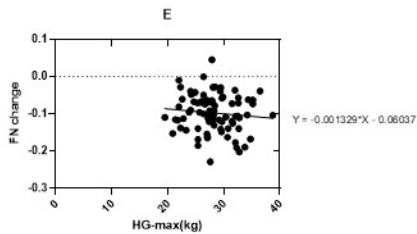

Supplement: meno-29-1176-s008.pdf [file meno-29-1176-s008.pdf]
